# Supplementary material
Source: PubMed Central journal article supplement (PMC4787925)
Supplement: kirh741421.w1_default.pdf [file kirh741421.w1_default.pdf]

## Appendix

The two most common lifestyle patterns in each lifestyle index group, in the Diet, Cancer and Health Cohort. The score of 1 indicated that the recommendation was followed, and the score of 0 indicated that the recommendation was not followed\*

| Lifestyle index points | Smoking | Alcohol | Physical activity | Waist circumference | Diet | No (%) of participants who followed stated recommendations |
|------------------------|---------|---------|-------------------|---------------------|------|------------------------------------------------------------|
| 0-1                    | 0       | 0       | 1                 | 0                   | 0    | 1,417 (31)                                                 |
|                        | 0       | 0       | 0                 | 1                   | 0    | 1,371 (30)                                                 |
| 2                      | 0       | 0       | 1                 | 1                   | 0    | 5,669 (40)                                                 |
|                        | 1       | 0       | 1                 | 0                   | 0    | 2,409 (17)                                                 |
| 3                      | 1       | 0       | 1                 | 1                   | 0    | 8,747 (39)                                                 |
|                        | 0       | 1       | 1                 | 1                   | 0    | 6,728 (30)                                                 |
| 4                      | 1       | 1       | 1                 | 1                   | 0    | 13,392 (97)                                                |
|                        | 1       | 0       | 1                 | 1                   | 1    | 197 (1)                                                    |
| 5                      | 1       | 1       | 1                 | 1                   | 1    | 510 (100)                                                  |

\*For example, among the participants who followed 0-1 recommendation, 31% followed the recommendation for physical activity and 30% followed the recommendation for waist circumference.
